# Supplementary material
Source: publisher site journal article supplement (https://www.spandidos-publications.com/5318/downloadSupplementary)

Figure S1. Casticin has no effect on phosphorylated TAK1 and p38 and JNK of the MAPK pathway. (A) Representative images revealed the expression of TAK1, p38 and GSK3 $\beta$  phosphorylated proteins. (B-D) The ratio of quantified phosphorylated related proteins to corresponding total proteins was quantified. All data are expressed as the mean  $\pm$  SD. Cas, casticin.

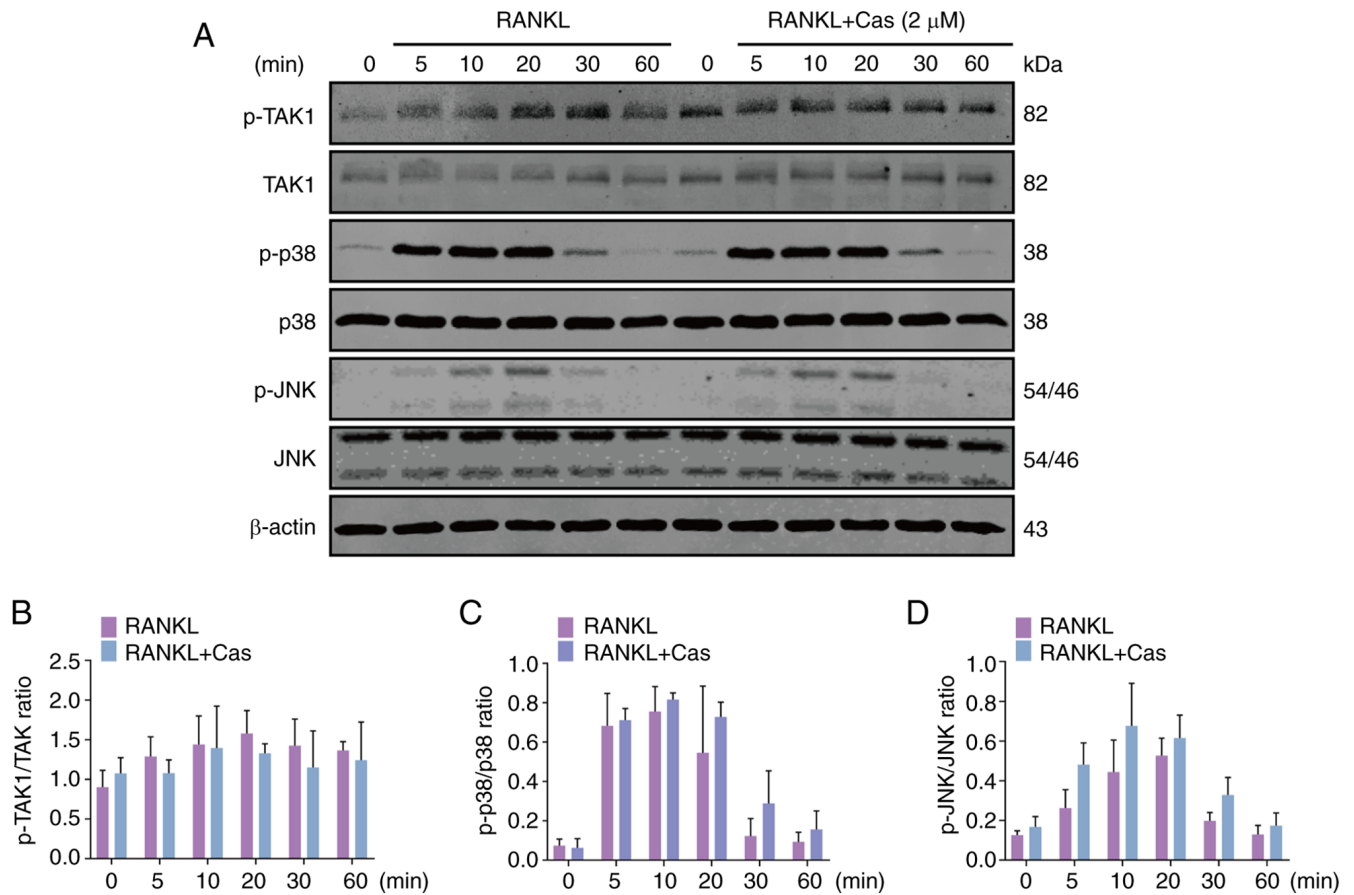

Figure S2. Casticin has no significant toxic effects on the liver, kidney, and heart of ovariectomized mice. Representative images of hematoxylin and eosin staining of the liver, kidney, and heart. OVX, ovariectomized; E<sub>2</sub>, estradiol; Cas, casticin.

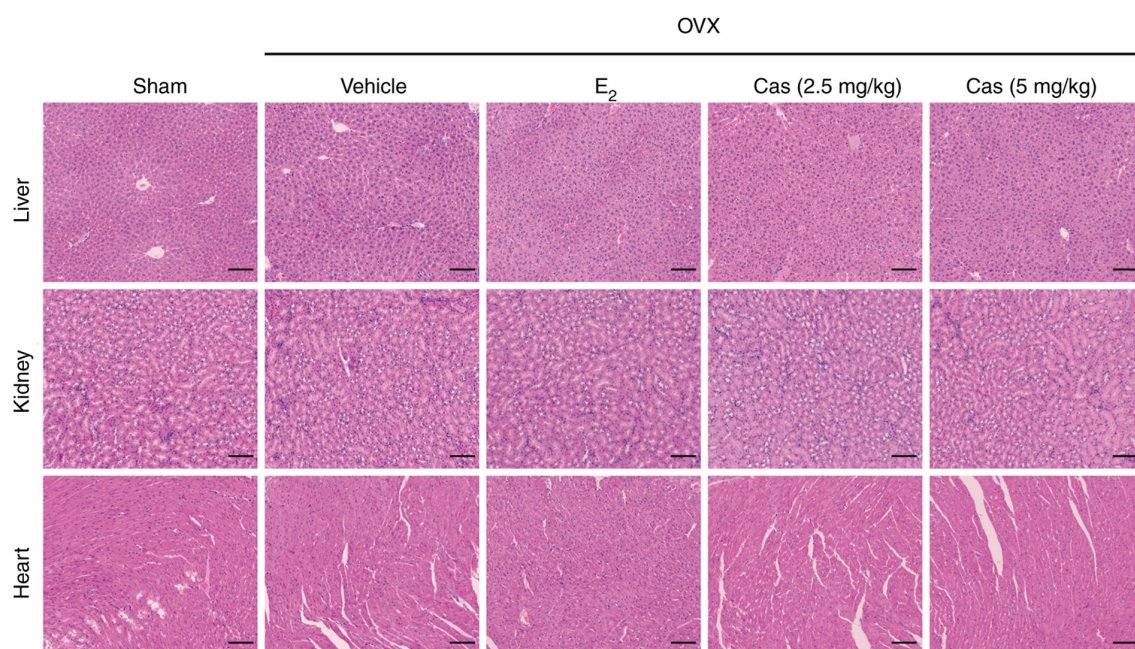

Figure S3. Cas does not affect osteoblast formation and mineralization. (A) Presence of Cas (1 and 2  $\mu\text{M}$ ) representative images of ALP staining at 7 days. (B) Quantitative intensity of ALP after Cas treatment. (C) Representative images of Alizarin Red S staining in the presence of Cas (1 and 2  $\mu\text{M}$ ) for 21 days. (D) Quantitative intensity of Alizarin Red S after Cas treatment. All data are expressed as the mean  $\pm$  SD. Cas, casticin; ALP, alkaline phosphatase; ARD, Alizarin Red S.

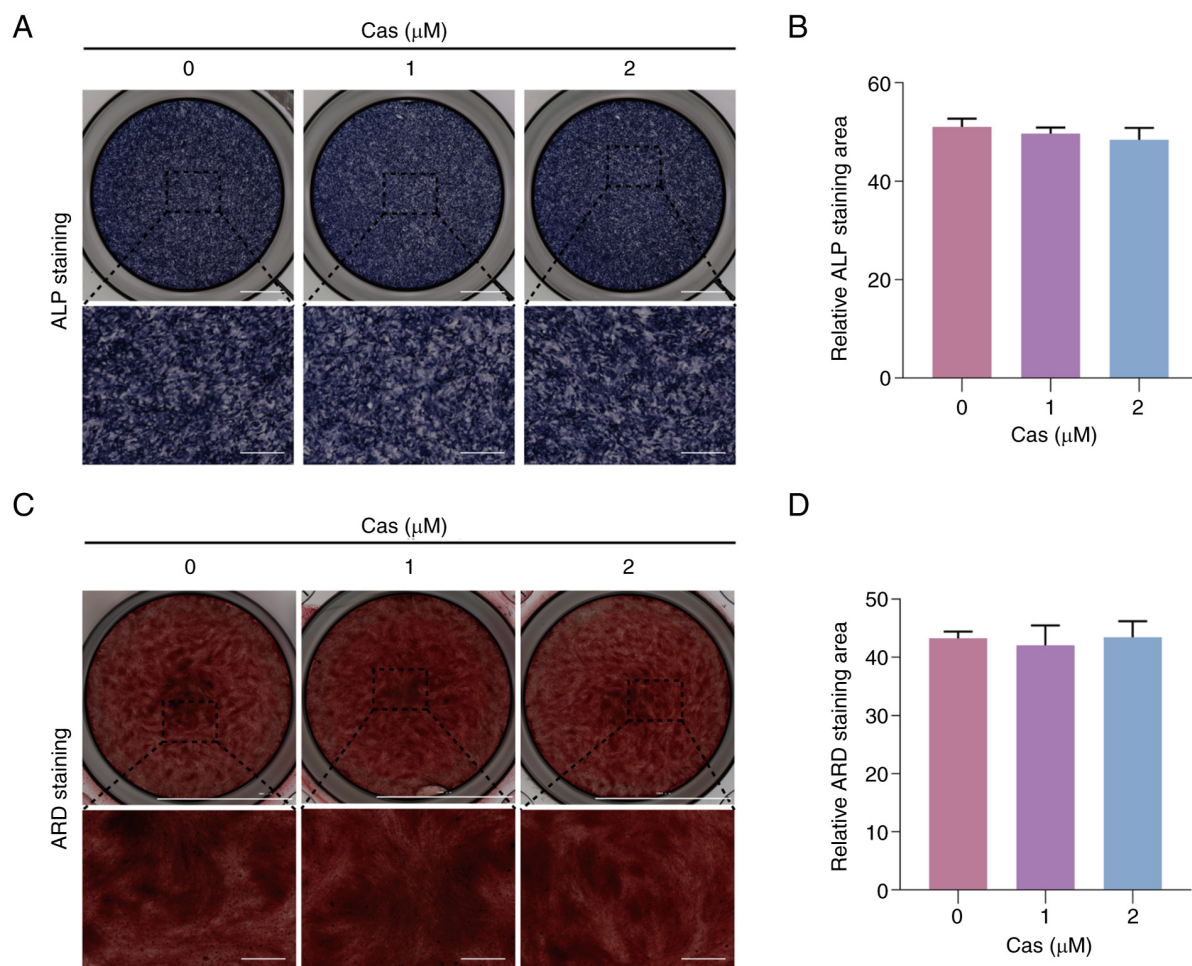

Supplement: Supplementary file 1 [file downloadSupplementary]
